# Supplementary material for: Alcohol and Cannabis Intake in Nursing Students
Source: MDPI journal article supplement (doi:10.3390/medicina55100628), 2019-09-24
Supplement: s1 [file s1]

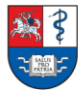

**Table S1.** Descriptive analysis of the items of AUDIT.

| Item                                                                                                                                      | Answer                        | Frecuency (n) | Percentage |
|-------------------------------------------------------------------------------------------------------------------------------------------|-------------------------------|---------------|------------|
| Item 1. How often do you have a drink containing alcohol?                                                                                 | Never                         | 18            | 9.8        |
|                                                                                                                                           | Monthly or less               | 41            | 22.3       |
|                                                                                                                                           | 2 to 4 times a month          | 97            | 52.7       |
|                                                                                                                                           | 2 to 3 times a week           | 27            | 14.7       |
|                                                                                                                                           | 4 or more times a week        | 1             | 0.5        |
| Item 2. How many drinks containing alcohol do you have on a typical day when you are drinking?                                            | 1 or 2                        | 101           | 54.9       |
|                                                                                                                                           | 3 or 4                        | 50            | 27.2       |
|                                                                                                                                           | 5 or 6                        | 25            | 13.6       |
|                                                                                                                                           | 7, 8 or 9                     | 7             | 3.8        |
|                                                                                                                                           | 10 or more                    | 1             | 0.5        |
| Item 3. How often do you have six or more drinks on one occasion?                                                                         | Never                         | 92            | 50.0       |
|                                                                                                                                           | Less than monthly             | 59            | 32.1       |
|                                                                                                                                           | Monthly                       | 32            | 17.4       |
|                                                                                                                                           | Weekly                        | 1             | 0.5        |
|                                                                                                                                           | Daily or almost daily         | 0             | 0.0        |
| Item 4. How often during the last year have you found that you were no able to stop drinking once you had started?                        | Never                         | 145           | 78.8       |
|                                                                                                                                           | Less than monthly             | 24            | 13.0       |
|                                                                                                                                           | Monthly                       | 9             | 4.9        |
|                                                                                                                                           | Weekly                        | 1             | 0.5        |
|                                                                                                                                           | Daily or almost daily         | 5             | 2.7        |
| Item 5. How often during the last year have you failed to do what was normally expected from you because of drinking?                     | Never                         | 149           | 81.0       |
|                                                                                                                                           | Less than monthly             | 31            | 16.8       |
|                                                                                                                                           | Monthly                       | 4             | 2.2        |
|                                                                                                                                           | Weekly                        | 0             | 0.0        |
|                                                                                                                                           | Daily or almost daily         | 0             | 0.0        |
| Item 6. How often during the last year have you needed a first drink in the morning to get yourself going after a heavy drinking session? | Never                         | 133           | 72.3       |
|                                                                                                                                           | Less than monthly             | 39            | 21.2       |
|                                                                                                                                           | Monthly                       | 10            | 5.4        |
|                                                                                                                                           | Weekly                        | 1             | 0.5        |
|                                                                                                                                           | Daily or almost daily         | 1             | 0.5        |
| Item 7. How often during the last year have you had a feeling of guilt or remorse after drinking?                                         | Never                         | 124           | 67.4       |
|                                                                                                                                           | Less than monthly             | 43            | 23.4       |
|                                                                                                                                           | Monthly                       | 13            | 7.1        |
|                                                                                                                                           | Weekly                        | 4             | 2.2        |
|                                                                                                                                           | Daily or almost daily         | 0             | 0.0        |
| Item 8. How often during the last year have you been unable to remember what happened the night before because you had been drinking?     | Never                         | 118           | 64.1       |
|                                                                                                                                           | Less than monthly             | 56            | 30.4       |
|                                                                                                                                           | Monthly                       | 8             | 4.3        |
|                                                                                                                                           | Weekly                        | 2             | 1.1        |
|                                                                                                                                           | Daily or almost daily         | 0             | 0.0        |
| Item 9. Have you or someone else been injured as a result of your drinking?                                                               | No                            | 173           | 94.0       |
|                                                                                                                                           | Yes, but not in the last year | 6             | 3.3        |
|                                                                                                                                           | Yes, during the last year     | 5             | 2.7        |
| Item 10. Has a relative or friend or a doctor or another health worker been concerned about your drinking or suggested you cut down?      | No                            | 172           | 93.5       |
|                                                                                                                                           | Yes, but not in the last year | 7             | 3.8        |
|                                                                                                                                           | Yes, during the last year     | 5             | 2.7        |

**Table S2.** Descriptive analysis of the items of CRAFFT.

|        | Item                                                                                                                                                             | Answer | Frecuency | Percentage |
|--------|------------------------------------------------------------------------------------------------------------------------------------------------------------------|--------|-----------|------------|
| PART A | Item 1. Drink any alcohol (more than a few sips)? (Do not count sips of alcohol taken during family or religious events)                                         | Yes    | 158       | 86.8       |
|        |                                                                                                                                                                  | No     | 24        | 13.2       |
|        | Item 2. Smoke any marijuana or hashish?                                                                                                                          | Yes    | 62        | 34.1       |
|        |                                                                                                                                                                  | No     | 120       | 65.9       |
|        | Item 3. Use anything else to get high?<br>("anything else" includes illegal drugs, over the counter and prescription drugs, and things that you sniff or "huff") | Yes    | 10        | 5.5        |
|        |                                                                                                                                                                  | No     | 172       | 94.5       |
| PART B | Item 4. Have you ever ridden in a car by someone (including yourself) who was "high" or had been using alcohol or drugs?                                         | Yes    | 121       | 75.6       |
|        |                                                                                                                                                                  | No     | 39        | 24.4       |
|        | Item 5. Do your family or friends ever tell you that you should cut down on your drinking or drug use?                                                           | Yes    | 17        | 10.6       |
|        |                                                                                                                                                                  | No     | 143       | 89.4       |
|        | Item 6. Do you ever use alcohol or drugs to relax, feel better about yourself, or fit in?                                                                        | Yes    | 48        | 30.0       |
|        |                                                                                                                                                                  | No     | 112       | 70.0       |
|        | Item 7. Have you ever gotten into trouble while you were using alcohol or drugs?                                                                                 | Yes    | 17        | 10.6       |
|        |                                                                                                                                                                  | No     | 143       | 89.4       |
|        | Item 8. Do you ever forget things you did while using alcohol or drugs?                                                                                          | Yes    | 84        | 52.5       |
|        |                                                                                                                                                                  | No     | 76        | 47.5       |
|        | Item 9. Do you ever use alcohol or drugs while you are by yourself, or alone?                                                                                    | Yes    | 31        | 19.4       |
|        |                                                                                                                                                                  | No     | 129       | 80.6       |
